# Supplementary material
Source: MDPI journal article supplement (https://www.mdpi.com/2073-4441/15/9/1709)
Supplement: s1 [file s1]

# Sodium alginate-based composite films for effective removal of Congo Red and Coralene Dark Red 2B dyes: Kinetic, isotherm and thermodynamic analysis

Amina Mokeddem<sup>1</sup>, Samir Benykhlef<sup>1,2</sup>, Amine Ahmed Bendaoudi<sup>1</sup>, Nacer Boudouaia<sup>1</sup>, Hacene Mahmoudi<sup>3</sup>, Zohra Bengharez<sup>1,\*</sup>, Seda Demirel Topel<sup>4</sup> and Önder Topel<sup>5</sup>

<sup>1</sup> Laboratory of Advanced Materials and Physicochemistry for Environment and Health, Djillali Liabes University, Sidi Bel Abbes 22000, Algeria

<sup>2</sup> Ecole Supérieure en Sciences Appliquées de Tlemcen, ESSA-Tlemcen, BP 165 RP Bel Horizon, Tlemcen 13000, Algeria

<sup>3</sup> Faculty of Technology, University Hassiba Benbouali of Chlef, Chlef 02000, Algeria

<sup>4</sup> Department of Electrical and Electronics Engineering, Faculty of Engineering and Natural Sciences, Antalya Bilim University, Dosemealti, Antalya 07190, Turkey

<sup>5</sup> Department of Chemistry, Faculty of Science, Akdeniz University, Antalya 07058, Turkey;

\*Correspondence: [dzbengharez@yahoo.fr](mailto:dzbengharez@yahoo.fr) (Z.B); Tel: +213 5 41 76 15 78

## Supplementary Materials

**Table S1.** Zeta potential of Alg/Cs films at different pH

| pH | Zeta Potential(mV) |               |              |              |               |
|----|--------------------|---------------|--------------|--------------|---------------|
|    | M1                 | M2            | M3           | M4           | M5            |
| 2  | -41.83 ± 2.55      | -11.61 ± 2.99 | 10.40 ± 3.32 | 39.83 ± 0.62 | 78.7 ± 7.06   |
| 4  | -75.5 ± 2.53       | -71.9 ± 4.86  | 2.66 ± 1.46  | 29.33 ± 8.71 | 78.63 ± 2.15  |
| 10 | -71.5 ± 2.6        | -48.7 ± 2.8   | -3.33 ± 0.5  | 2.66 ± 2.91  | 48.16 ± 12.68 |
| 12 | -69.63 ± 2.51      | -44.23 ± 0.35 | 13.76 ± 2.24 | -11.5 ± 0.26 | 60 ± 1.13     |

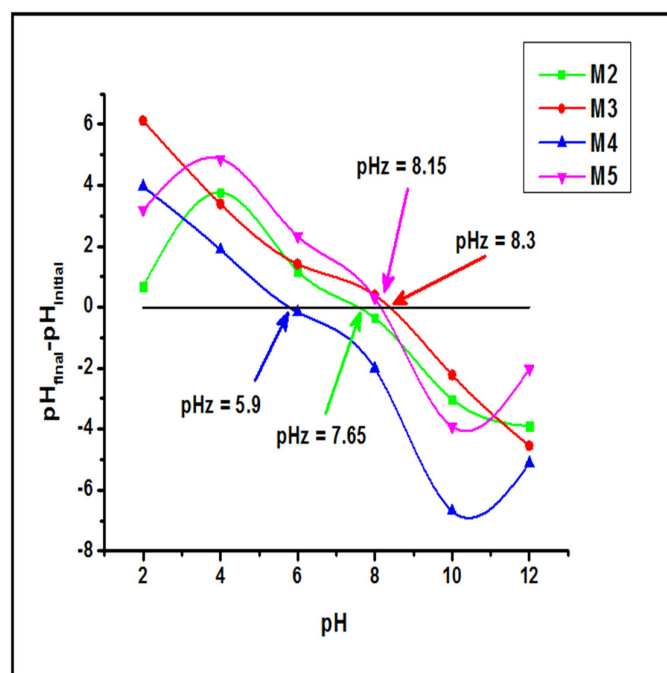

**Figure S1.** Point of zero charge  $pH_{pzc}$  of Alg/Cs films

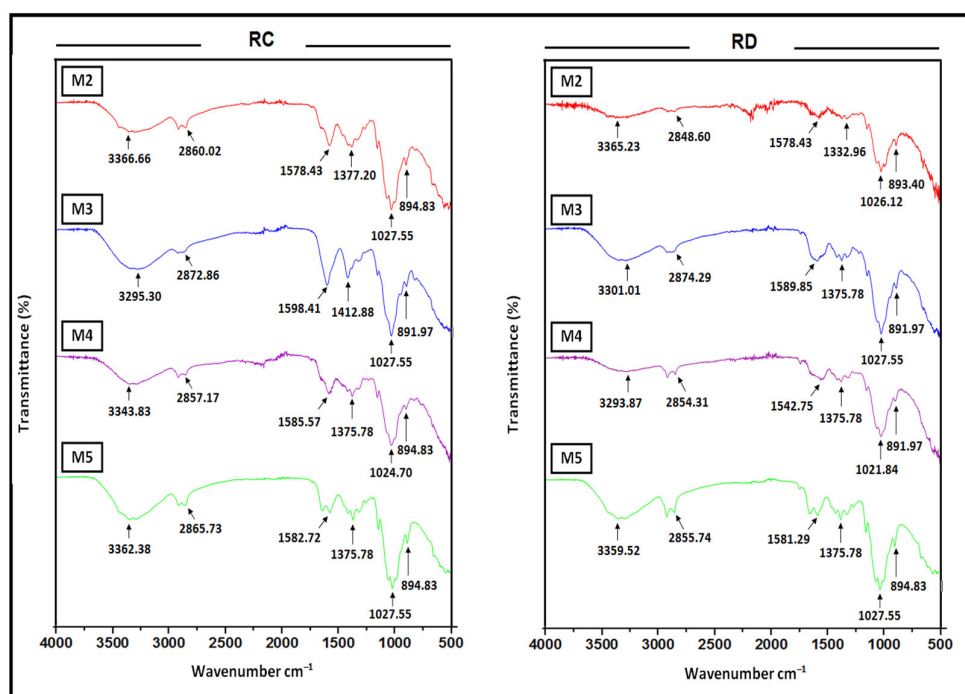

**Figure S2.** FTIR spectra of Alg/Cs films after adsorption (a) RC dye; (b) RD dye
